# Supplementary material for: Bridging cyanides from cyanoiron metalloligands to redox-active dinitrosyl iron units
Source: Royal Society of Chemistry journal article supplement (doi:10.1039/c8dt01761a), 2018-01-01
Supplement: c8dt01761a1.pdf [file c8dt01761a1.pdf]

## Supplemental Information

### Bridging Cyanides from Cyanoiron Metalloligands to Redox-active Dinitrosyl Iron Units

Pokhraj Ghosh<sup>#,‡</sup>, Manuel Quiroz<sup>#,‡</sup>, Randara Pulukkody<sup>#</sup>, Nattamai Bhuvanesh,<sup>#</sup> and Marcetta Y. Darensbourg<sup>#,\*</sup>

<sup>#</sup>*Department of Chemistry, Texas A & M University, College Station, Texas 77843, United States*

<sup>‡</sup>*Equally contributing authors*

**Reactivity Studies**.....S4

#### Infrared Spectroscopy

**Figure S1.** Infrared spectrum of (dppe)( $\eta^5$ -C<sub>5</sub>H<sub>5</sub>)Fe(CN) (**Fe'-CN**) in CH<sub>2</sub>Cl<sub>2</sub>.....S5

**Figure S2.** Infrared spectrum of (dppe)( $\eta^5$ -C<sub>5</sub>Me<sub>5</sub>)Fe(CN) (**Fe\*-CN**) in CH<sub>2</sub>Cl<sub>2</sub>.....S5

**Figure S3.** Infrared spectrum of sImesFe(NO)<sub>2</sub>(SPh) (in red) after reacting [(dppe)( $\eta^5$ -C<sub>5</sub>H<sub>5</sub>)Fe-CN-Fe(NO)<sub>2</sub>(IMes)][BF<sub>4</sub>] (**Fe-1**) (in blue) with sodium phenolate in THF.....S6

**Figure S4.** Infrared spectrum of sImesFe(NO)<sub>2</sub>(SPh) (in red) after reacting [(dppe)( $\eta^5$ -C<sub>5</sub>Me<sub>5</sub>)Fe-CN-Fe(NO)<sub>2</sub>(IMes)][BF<sub>4</sub>] (**Fe\*-1**) (in blue) with sodium phenolate in THF.....S6

**Figure S5.** Infrared spectrum of (Me<sub>3</sub>P)<sub>2</sub>Fe(NO)<sub>2</sub> (in red) after reacting [(dppe)( $\eta^5$ -C<sub>5</sub>H<sub>5</sub>)Fe-CN-Fe(NO)<sub>2</sub>(IMes)][BF<sub>4</sub>] (**Fe-1**) (in blue) with Me<sub>3</sub>P in THF.....S7

**Figure S6.** Infrared spectrum of (Me<sub>3</sub>P)Fe(NO)<sub>2</sub> (in red) after reacting [(dppe)( $\eta^5$ -C<sub>5</sub>Me<sub>5</sub>)Fe-CN-Fe(NO)<sub>2</sub>(IMes)][BF<sub>4</sub>] (**Fe\*-1**) (in blue) with Me<sub>3</sub>P in THF.....S7

**Figure S7.** Infrared spectrum of (Me<sub>3</sub>P)Fe(NO)<sub>2</sub> (in red) after reacting [(dppe)( $\eta^5$ -C<sub>5</sub>Me<sub>5</sub>)Fe-CN)<sub>2</sub>-Fe(NO)<sub>2</sub>] (**Fe\*-2**) (in blue) with Me<sub>3</sub>P in THF at - 5°C.....S8

**Figure S8.** Infrared spectrum of (Me<sub>3</sub>P)<sub>2</sub>Fe(NO)<sub>2</sub> in THF.....S8

#### Electrochemistry

**Figure S9.** Cyclic voltammogram of (dppe)( $\eta^5$ -C<sub>5</sub>H<sub>5</sub>)Fe(CN) (**Fe'-CN**) in CH<sub>2</sub>Cl<sub>2</sub> referenced to Fe<sup>0/+</sup>...S9

|                                                                                                                                                                                                                                                                                                                                                                                       |     |
|---------------------------------------------------------------------------------------------------------------------------------------------------------------------------------------------------------------------------------------------------------------------------------------------------------------------------------------------------------------------------------------|-----|
| <b>Figure S10.</b> Cyclic voltammogram of (dppe)( $\eta^5$ -C <sub>5</sub> Me <sub>5</sub> )Fe(CN) ( <b>Fe*-CN</b> ) in CH <sub>2</sub> Cl <sub>2</sub> referenced to Fc <sup>0/+</sup> .....                                                                                                                                                                                         | S9  |
| <b>Figure S11.</b> Cyclic voltammogram of (dppe)( $\eta^5$ -C <sub>5</sub> H <sub>5</sub> )Fe(CN) ( <b>Fe'-CN</b> ) recorded at different scan rates in DCM referenced to Fc <sup>0/+</sup> .....                                                                                                                                                                                     | S10 |
| <b>Figure S12.</b> Cyclic voltammogram of (dppe)( $\eta^5$ -C <sub>5</sub> Me <sub>5</sub> )Fe(CN) ( <b>Fe*-CN</b> ) recorded at different scan rates in DCM referenced to Fc <sup>0/+</sup> .....                                                                                                                                                                                    | S10 |
| <b>Figure S13.</b> Cyclic voltammogram of [(dppe)( $\eta^5$ -C <sub>5</sub> H <sub>5</sub> )Fe-CN-Fe(NO) <sub>2</sub> (IMes)][BF <sub>4</sub> ] ( <b>Fe-1</b> ) recorded at different scan rates in DCM referenced to Fc <sup>0/+</sup> .....                                                                                                                                         | S11 |
| <b>Figure S14.</b> Cyclic voltammogram of [(dppe)( $\eta^5$ -C <sub>5</sub> Me <sub>5</sub> )Fe-CN-Fe(NO) <sub>2</sub> (IMes)][BF <sub>4</sub> ] ( <b>Fe*-1</b> ) recorded at different scan rates in DCM referenced to Fc <sup>0/+</sup> .....                                                                                                                                       | S11 |
| <b>Figure S15.</b> The reduction event, {Fe(NO) <sub>2</sub> } <sup>9/10</sup> , of [(dppe)( $\eta^5$ -C <sub>5</sub> Me <sub>5</sub> )Fe-CN) <sub>2</sub> -Fe(NO) <sub>2</sub> ] ( <b>Fe*-2</b> ) recorded at different scan rates in THF referenced to Fc <sup>0/+</sup> .....                                                                                                      | S12 |
| <b>Figure S16.</b> Cyclic voltammogram with repeated scans of [(dppe)( $\eta^5$ -C <sub>5</sub> H <sub>5</sub> )Fe-CN-Fe(NO) <sub>2</sub> (IMes)][BF <sub>4</sub> ] ( <b>Fe-1</b> ) in DCM referenced to Fc <sup>0/+</sup> .....                                                                                                                                                      | S12 |
| <b>Figure S17.</b> Cyclic voltammogram with repeated scans of [(dppe)( $\eta^5$ -C <sub>5</sub> Me <sub>5</sub> )Fe-CN-Fe(NO) <sub>2</sub> (IMes)][BF <sub>4</sub> ] ( <b>Fe*-1</b> ) in DCM referenced to Fc <sup>0/+</sup> .....                                                                                                                                                    | S13 |
| <b>Figure S18.</b> Positive-ion ESI mass spectrum of [(dppe)( $\eta^5$ -C <sub>5</sub> H <sub>5</sub> )Fe-CN-Fe(NO) <sub>2</sub> (IMes)][BF <sub>4</sub> ] ( <b>Fe-1</b> ) in CH <sub>3</sub> CN; inset: Calculated isotopic distribution for complex [(dppe)( $\eta^5$ -C <sub>5</sub> H <sub>5</sub> )Fe-CN-Fe(NO) <sub>2</sub> (IMes)][BF <sub>4</sub> ] ( <b>Fe-1</b> ) .....     | S13 |
| <b>Figure S19.</b> Positive-ion ESI mass spectrum of [(dppe)( $\eta^5$ -C <sub>5</sub> Me <sub>5</sub> )Fe-CN-Fe(NO) <sub>2</sub> (IMes)][BF <sub>4</sub> ] ( <b>Fe*-1</b> ) in CH <sub>3</sub> CN; inset: Calculated isotopic distribution for complex [(dppe)( $\eta^5$ -C <sub>5</sub> Me <sub>5</sub> )Fe-CN-Fe(NO) <sub>2</sub> (IMes)][BF <sub>4</sub> ] ( <b>Fe*-1</b> ) ..... | S14 |
| <b>Figure S20.</b> Positive-ion ESI mass spectrum of [((dppe)( $\eta^5$ -C <sub>5</sub> Me <sub>5</sub> )Fe-CN) <sub>2</sub> -Fe(NO) <sub>2</sub> ] ( <b>Fe*-2</b> ) in CH <sub>3</sub> CN/THF (1:1 v/v) .....                                                                                                                                                                        | S14 |
| <b>Molecular Structures</b>                                                                                                                                                                                                                                                                                                                                                           |     |
| <b>Figure S21.</b> Molecular structure of <b>Fe-1</b> .....                                                                                                                                                                                                                                                                                                                           | S15 |
| <b>Table T1.</b> Crystal data and structure refinement for <b>Fe-1</b> .....                                                                                                                                                                                                                                                                                                          | S15 |

|                                                                                                                         |     |
|-------------------------------------------------------------------------------------------------------------------------|-----|
| <b>Figure S22.</b> Molecular structure of <b>Fe*-1</b> .....                                                            | S17 |
| <b>Table T2.</b> Crystal data and structure refinement for <b>Fe*-1</b> .....                                           | S17 |
| <b>Figure S23.</b> Molecular structure of <b>Fe*-CN</b> .....                                                           | S19 |
| <b>Table T3.</b> Crystal data and structure refinement for <b>Fe*-CN</b> .....                                          | S19 |
| <b>Figure S24.</b> Molecular structure of <b>Fe*-2</b> .....                                                            | S21 |
| <b>Table T4.</b> Crystal data and structure refinement for <b>Fe*-2</b> .....                                           | S21 |
| <b>Figure S25.</b> Molecular structure of <b>(Me<sub>3</sub>P)<sub>2</sub>Fe(NO)<sub>2</sub></b> .....                  | S23 |
| <b>Table T5.</b> Crystal data and structure refinement for <b>(Me<sub>3</sub>P)<sub>2</sub>Fe(NO)<sub>2</sub></b> ..... | S23 |

## Reactivity Studies

For every Me<sub>3</sub>P reactivity study, 0.1 mL of Me<sub>3</sub>P was added to 10 mL of THF to generate a 0.097 M stock solution of Me<sub>3</sub>P.

**Reaction of Fe-1 with Me<sub>3</sub>P.** Approximately 144  $\mu$ L of a 0.097 M solution (1 equivalent, 0.014 mmol) of Me<sub>3</sub>P was added to a THF solution containing 15 mg (0.014 mmol) of [(dppe)( $\eta^5$ -C<sub>5</sub>H<sub>5</sub>)Fe-CN-Fe(NO)<sub>2</sub>(IMes)][BF<sub>4</sub>](Fe-1) 25 mins. Reaction completion and formation of (Me<sub>3</sub>P)<sub>2</sub>Fe(NO)<sub>2</sub> was monitored by IR spectroscopy after every equivalence of Me<sub>3</sub>P was added (7 total equivalence).

**Reaction of Fe\*-1 with Me<sub>3</sub>P.** Approximately 137  $\mu$ L of a 0.097 M solution (1 equivalent, 0.013 mmol) of Me<sub>3</sub>P was added to a THF solution containing 15 mg (0.013 mmol) of [(dppe)( $\eta^5$ -C<sub>5</sub>Me<sub>5</sub>)Fe-CN-Fe(NO)<sub>2</sub>(IMes)][BF<sub>4</sub>](Fe\*-1) every 25 mins. Reaction completion and formation of (Me<sub>3</sub>P)<sub>2</sub>Fe(NO)<sub>2</sub> was monitored by IR spectroscopy after every equivalence of Me<sub>3</sub>P was added (7 total equivalence).

**Reaction of Fe\*-2 with Me<sub>3</sub>P.** In a 50 mL Schlenk flask approximately 0.134 g (0.1 mmol) of freshly prepared [((dppe)( $\eta^5$ -C<sub>5</sub>Me<sub>5</sub>)Fe-CN)<sub>2</sub>-Fe(NO)<sub>2</sub>] in THF was reacted with excess Me<sub>3</sub>P (0.20 mL, 2.0 mmol) by stirring at -5 °C. Reaction completion and formation of (Me<sub>3</sub>P)<sub>2</sub>Fe(NO)<sub>2</sub> was monitored by IR spectroscopy.

**Reaction of Fe-1 with Na<sup>+</sup>SPh<sup>-</sup>.** Approximately 3.7 mg (0.028 mmol) of sodium phenolate in THF was added to a flask containing 15 mg (0.014 mmol) of [(dppe)( $\eta^5$ -C<sub>5</sub>H<sub>5</sub>)Fe-CN-Fe(NO)<sub>2</sub>(IMes)][BF<sub>4</sub>](Fe-1). Reaction was done in the time of mixing giving an orange-red colored solution and the formation of IMesFe(NO)<sub>2</sub>(SPh) was confirmed through IR spectroscopy.

**Reaction of Fe\*-1 with Na<sup>+</sup>SPh<sup>-</sup>.** Approximately 3.5 mg (0.026 mmol) of sodium phenolate in THF was added to a flask containing 15 mg (0.013 mmol) of [(dppe)( $\eta^5$ -C<sub>5</sub>Me<sub>5</sub>)Fe-CN-Fe(NO)<sub>2</sub>(IMes)][BF<sub>4</sub>](Fe-1). Reaction was done in the time of mixing giving an orange-red colored solution and the formation of IMesFe(NO)<sub>2</sub>(SPh) was confirmed through IR spectroscopy.

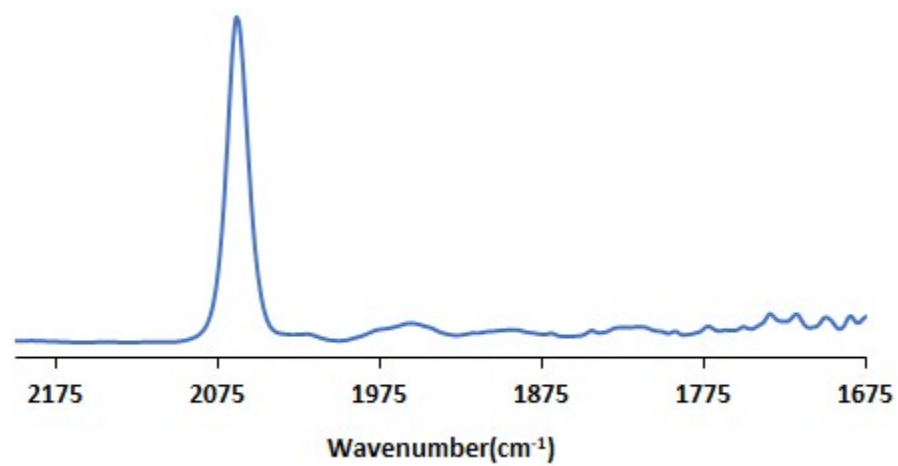

**Figure S1.** Infrared spectrum of (dppe)( $\eta^5$ -C<sub>5</sub>H<sub>5</sub>)Fe(CN) (**Fe<sup>3+</sup>**-CN) in CH<sub>2</sub>Cl<sub>2</sub>.

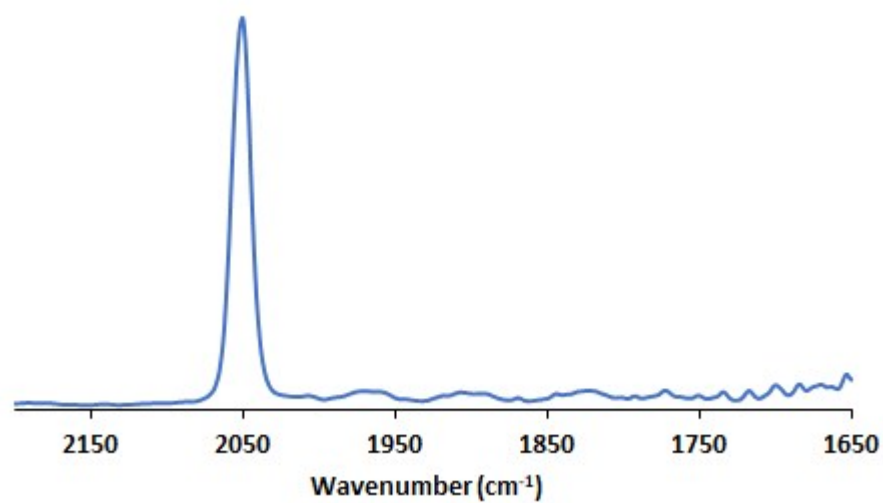

**Figure S2.** Infrared spectrum of (dppe)( $\eta^5$ -C<sub>5</sub>Me<sub>5</sub>)Fe(CN) (**Fe<sup>2+</sup>**-CN) in CH<sub>2</sub>Cl<sub>2</sub>.

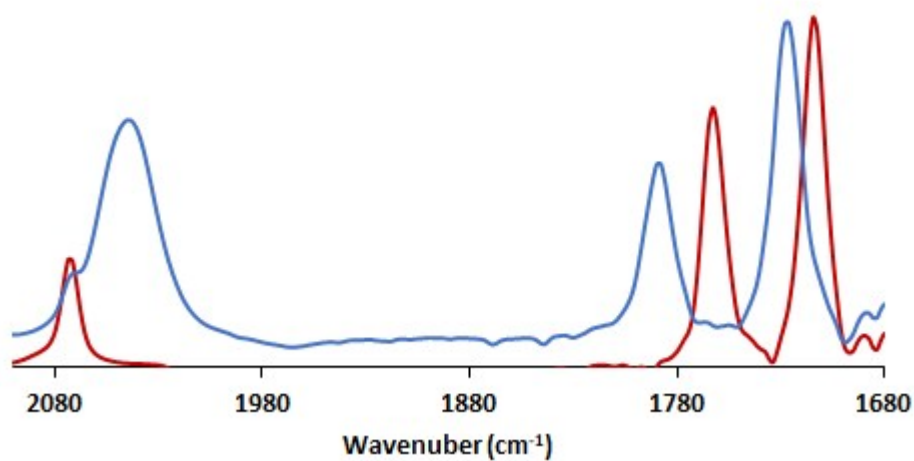

**Figure S3.** Infrared spectrum of sIMesFe(NO)<sub>2</sub>(SPh) (in red) after reacting [(dppe)(η<sup>5</sup>-C<sub>5</sub>H<sub>5</sub>)Fe-CN-Fe(NO)<sub>2</sub>(IMes)][BF<sub>4</sub>] (**Fe-1**) (in blue) with sodium phenolate in THF.

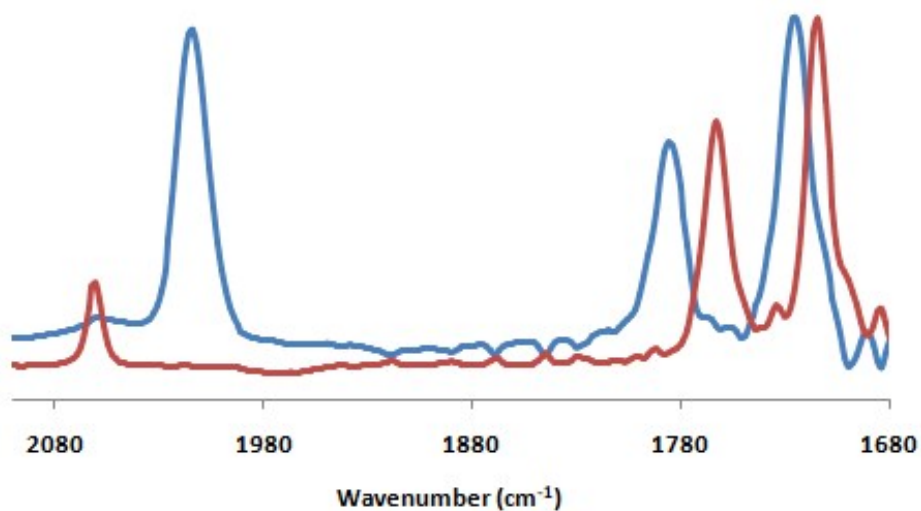

**Figure S4.** Infrared spectrum of sIMesFe(NO)<sub>2</sub>(SPh) (in red) after reacting [(dppe)(η<sup>5</sup>-C<sub>5</sub>Me<sub>5</sub>)Fe-CN-Fe(NO)<sub>2</sub>(IMes)][BF<sub>4</sub>] (**Fe\*-1**) (in blue) with sodium phenolate in THF.

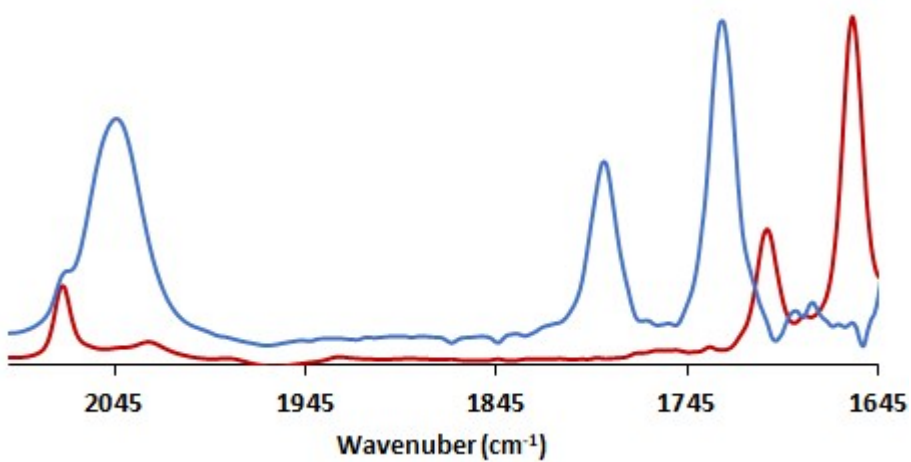

**Figure S5.** Infrared spectrum of  $(\text{Me}_3\text{P})_2\text{Fe}(\text{NO})_2$  (in red) after reacting  $[(\text{dppe})(\eta^5\text{-C}_5\text{H}_5)\text{Fe-CN-Fe}(\text{NO})_2(\text{IMes})][\text{BF}_4]$  (**Fe-1**) (in blue) with  $\text{Me}_3\text{P}$  in THF.

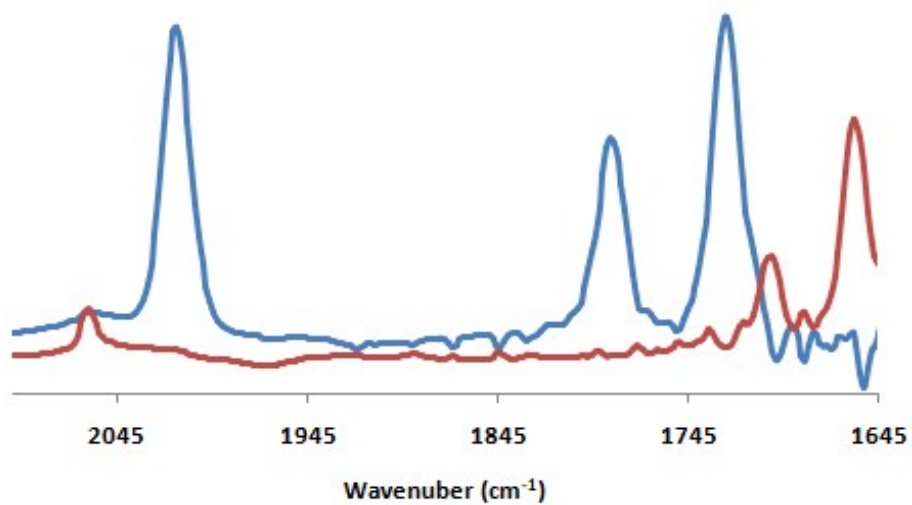

**Figure S6.** Infrared spectrum of  $(\text{Me}_3\text{P})\text{Fe}(\text{NO})_2$  (in red) after reacting  $[(\text{dppe})(\eta^5\text{-C}_5\text{Me}_5)\text{Fe-CN-Fe}(\text{NO})_2(\text{IMes})][\text{BF}_4]$  (**Fe\*-1**) (in blue) with  $\text{Me}_3\text{P}$  in THF.

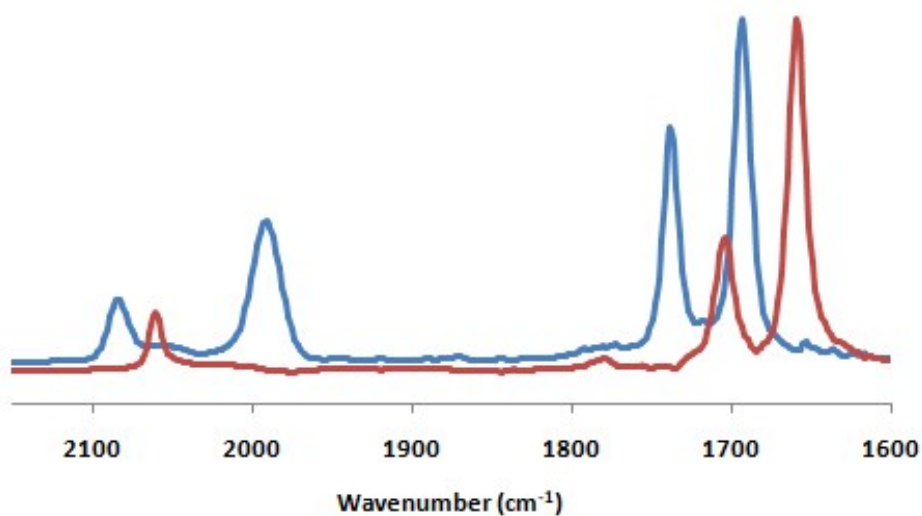

**Figure S7.** Infrared spectrum of  $(\text{Me}_3\text{P})\text{Fe}(\text{NO})_2$  (in red) after reacting  $[(\text{dppe})(\eta^5\text{-C}_5\text{Me}_5)\text{Fe-CN})_2\text{-Fe}(\text{NO})_2]$  (**Fe\*-2**) (in blue) with  $\text{Me}_3\text{P}$  in THF at  $-5^\circ\text{C}$ .

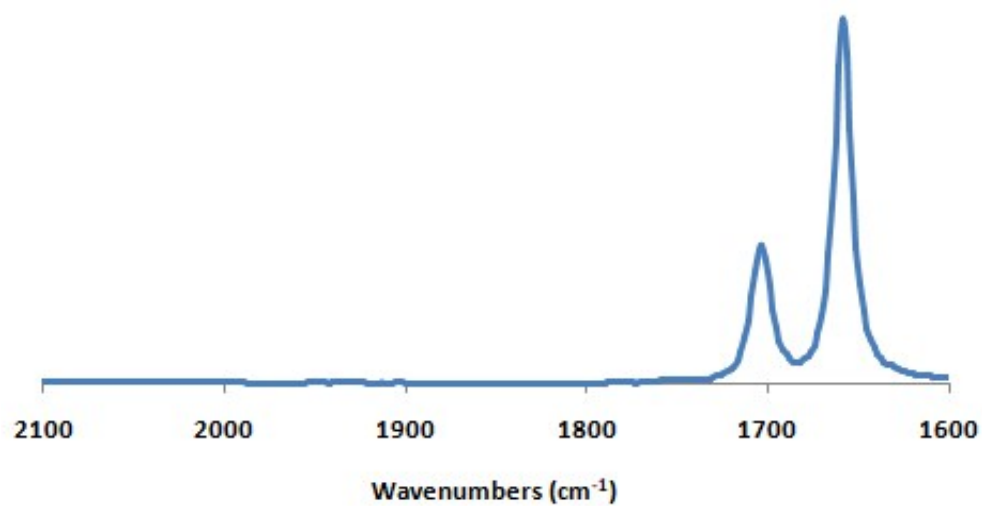

**Figure S8.** Infrared spectrum of  $(\text{Me}_3\text{P})_2\text{Fe}(\text{NO})_2$  in THF.



## Electrochemistry

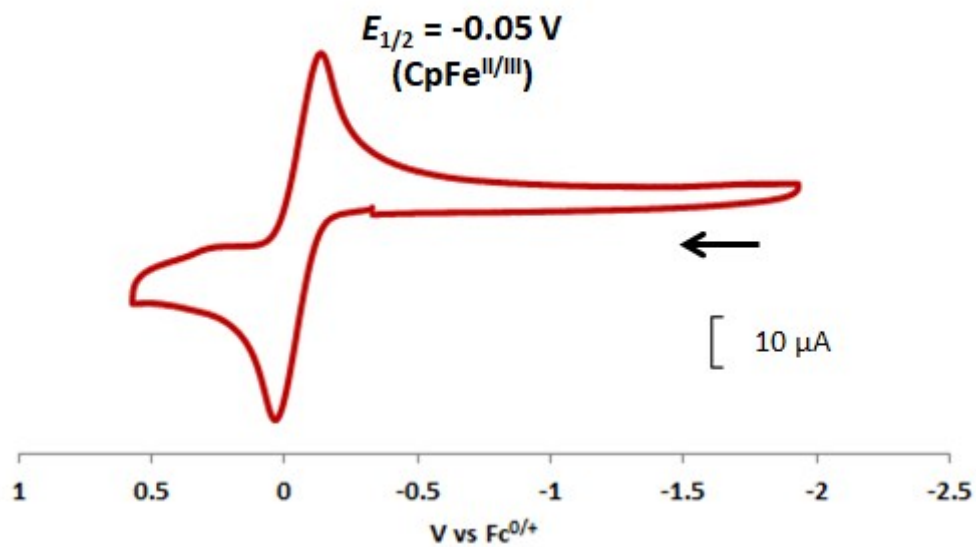

**Figure S9.** Cyclic voltammogram of (dppe)( $\eta^5$ -C<sub>5</sub>H<sub>5</sub>)Fe(CN) (Fe'-CN) in CH<sub>2</sub>Cl<sub>2</sub> referenced to Fc<sup>0/+</sup>.

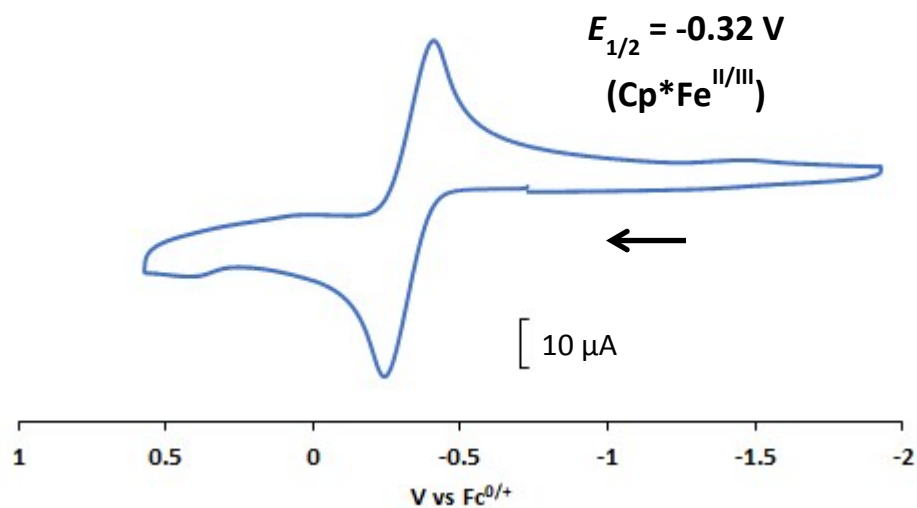

**Figure S10.** Cyclic voltammogram of (dppe)( $\eta^5$ -C<sub>5</sub>Me<sub>5</sub>)Fe(CN) (Fe\*-CN) in CH<sub>2</sub>Cl<sub>2</sub> referenced to Fc<sup>0/+</sup>.

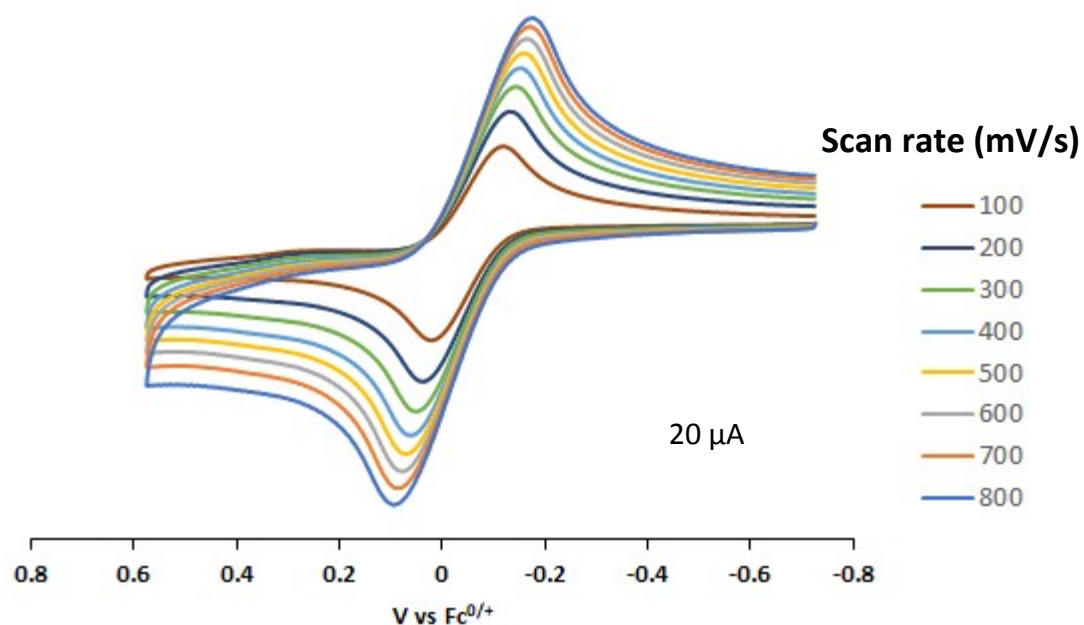

**Figure S11.** Cyclic voltammogram of (dppe)( $\eta^5$ -C<sub>5</sub>H<sub>5</sub>)Fe(CN) (Fe'-CN) recorded at different scan rates in DCM referenced to Fc<sup>0/+</sup>.

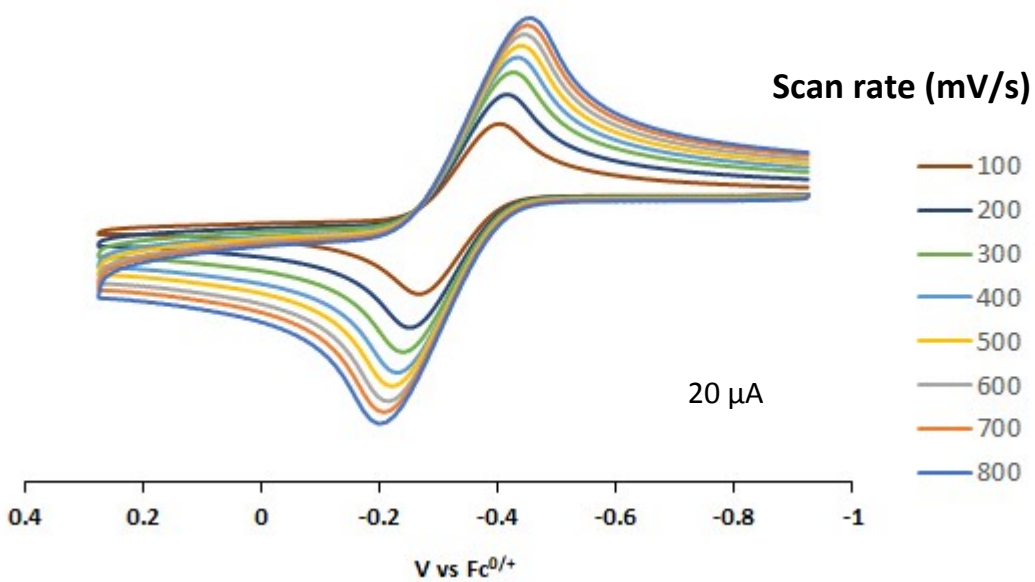

**Figure S12.** Cyclic voltammogram of (dppe)( $\eta^5$ -C<sub>5</sub>Me<sub>5</sub>)Fe(CN) (Fe\*-CN) recorded at different scan rates in DCM referenced to Fc<sup>0/+</sup>.

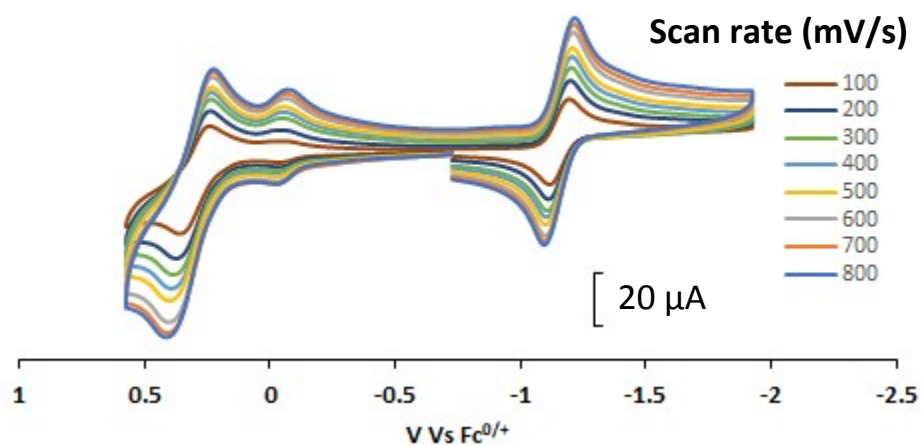

**Figure S13.** Cyclic voltammogram of  $[(\text{dppe})(\eta^5\text{-C}_5\text{H}_5)\text{Fe-CN-Fe(NO)}_2(\text{IMes})][\text{BF}_4]$  (**Fe-1**) recorded at different scan rates in DCM referenced to  $\text{Fc}^{0/+}$ .

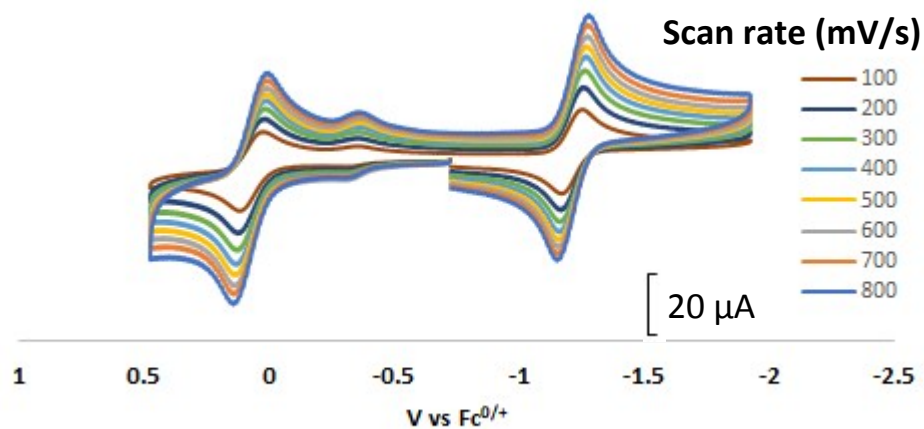

**Figure S14.** Cyclic voltammogram of  $[(\text{dppe})(\eta^5\text{-C}_5\text{Me}_5)\text{Fe-CN-Fe(NO)}_2(\text{IMes})][\text{BF}_4]$  (**Fe\*-1**) recorded at different scan rates in DCM referenced to  $\text{Fc}^{0/+}$ .

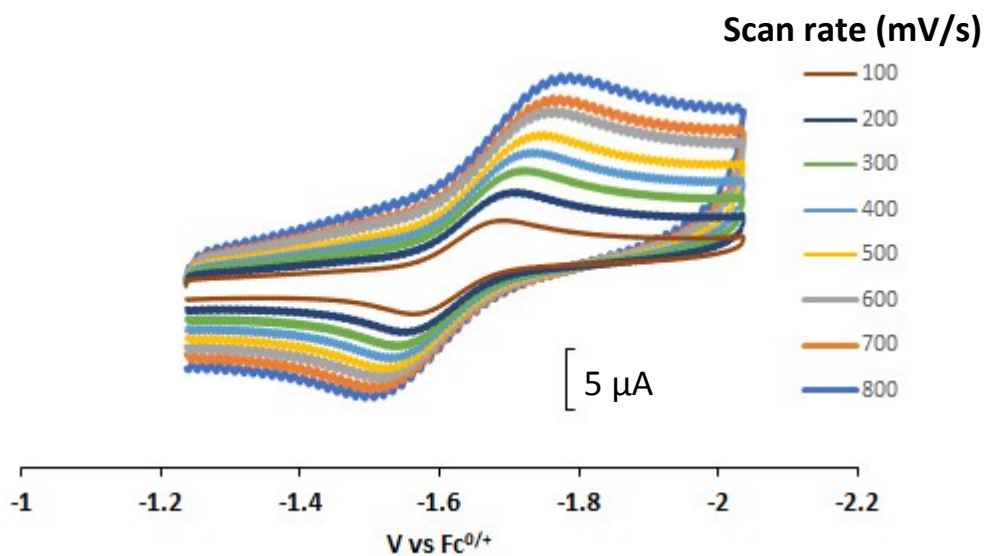

**Figure S15.** The reduction event,  $\{\text{Fe(NO)}_2\}^{9/10}$ , of  $[(\text{dppe})(\eta^5\text{-C}_5\text{Me}_5)\text{Fe-CN})_2\text{-Fe(NO)}_2]$  (**Fe\*-2**) recorded at different scan rates in THF referenced to  $\text{Fc}^{0/+}$ .

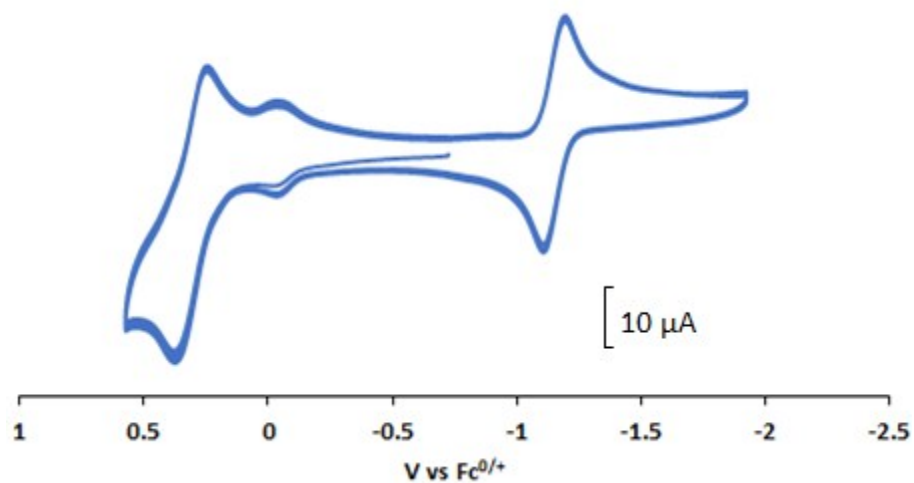

**Figure S16.** Cyclic voltammogram with repeated scans of  $[(\text{dppe})(\eta^5\text{-C}_5\text{H}_5)\text{Fe-CN-Fe(NO)}_2(\text{IMes})][\text{BF}_4]$  (**Fe-1**) in DCM referenced to  $\text{Fc}^{0/+}$ .

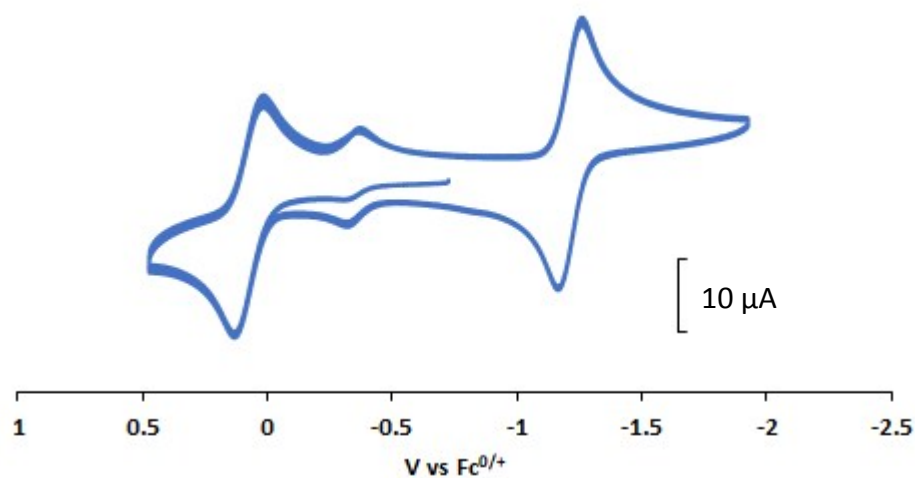

**Figure S17.** Cyclic voltammogram with repeated scans of  $[(dppe)(\eta^5-C_5Me_5)Fe-CN-Fe(NO)_2(IMes)][BF_4]$  (**Fe\*-1**) in DCM referenced to  $Fc^{0/+}$ .

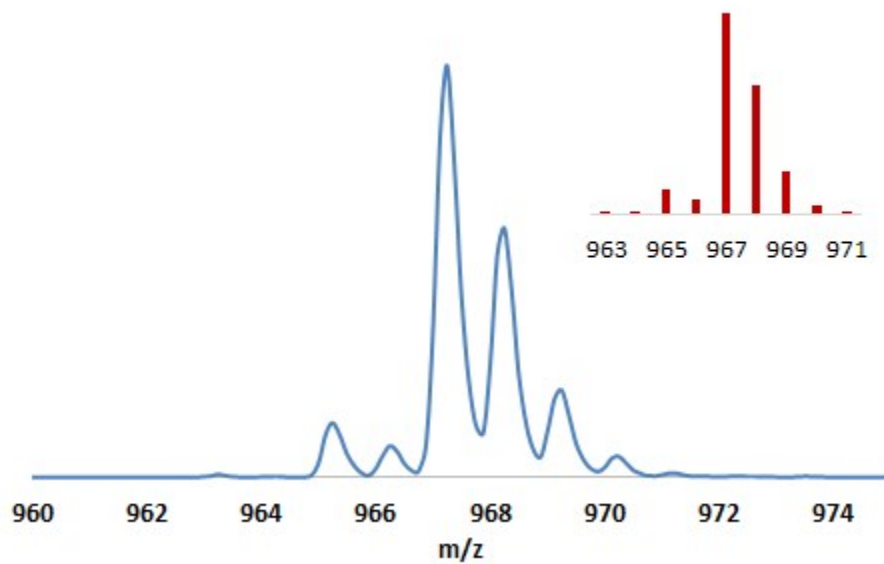

**Figure S18.** Positive-ion ESI mass spectrum of  $[(dppe)(\eta^5-C_5H_5)Fe-CN-Fe(NO)_2(IMes)][BF_4]$  (**Fe-1**) in  $CH_3CN$ ; inset: Calculated isotopic distribution for complex  $[(dppe)(\eta^5-C_5H_5)Fe-CN-Fe(NO)_2(IMes)][BF_4]$  (**Fe-1**).

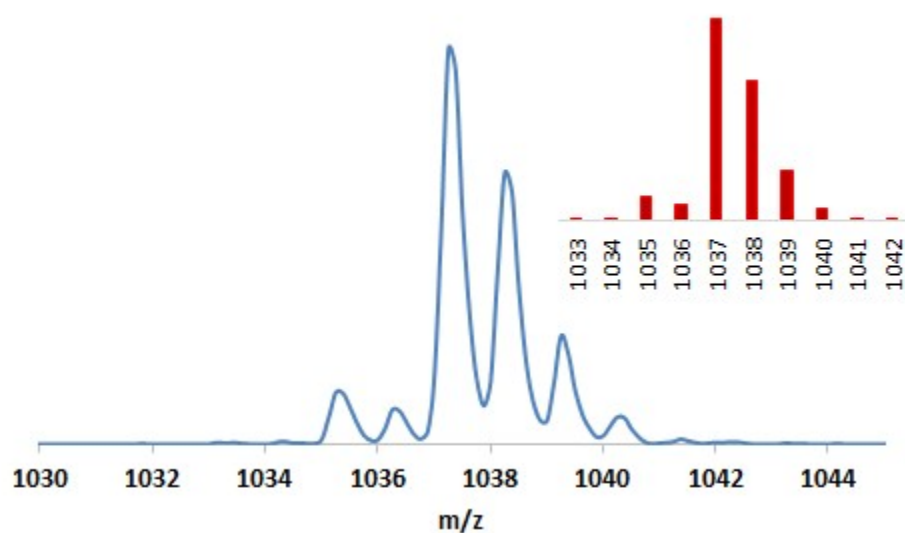

**Figure S19.** Positive-ion ESI mass spectrum of  $[(dppe)(\eta^5-C_5Me_5)Fe-CN-Fe(NO)_2(IMes)][BF_4]$  (**Fe\*-1**) in  $CH_3CN$ ; inset: Calculated isotopic distribution for complex  $[(dppe)(\eta^5-C_5Me_5)Fe-CN-Fe(NO)_2(IMes)][BF_4]$  (**Fe\*-1**).

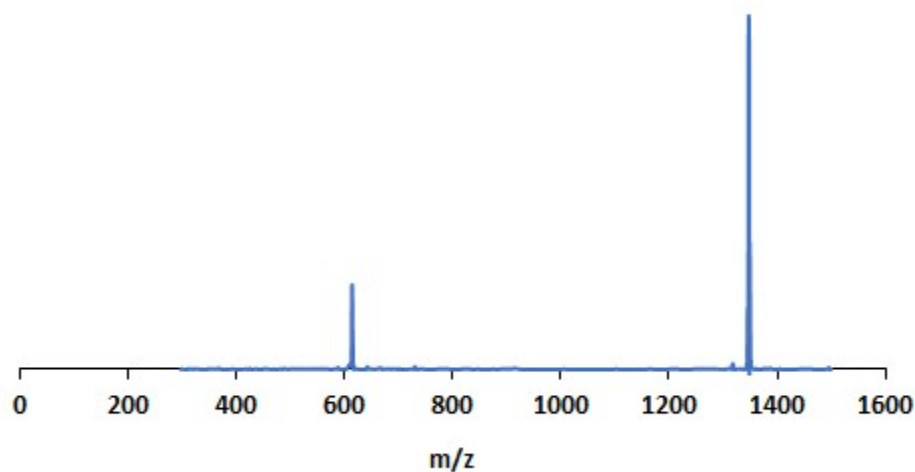

**Figure S20.** Positive-ion ESI mass spectrum of  $[((dppe)(\eta^5-C_5Me_5)Fe-CN)_2-Fe(NO)_2]$  (**Fe\*-2**) in  $CH_3CN/THF$  (1:1 v/v).

**Figure S21.** Molecular structure of **Fe-1**.

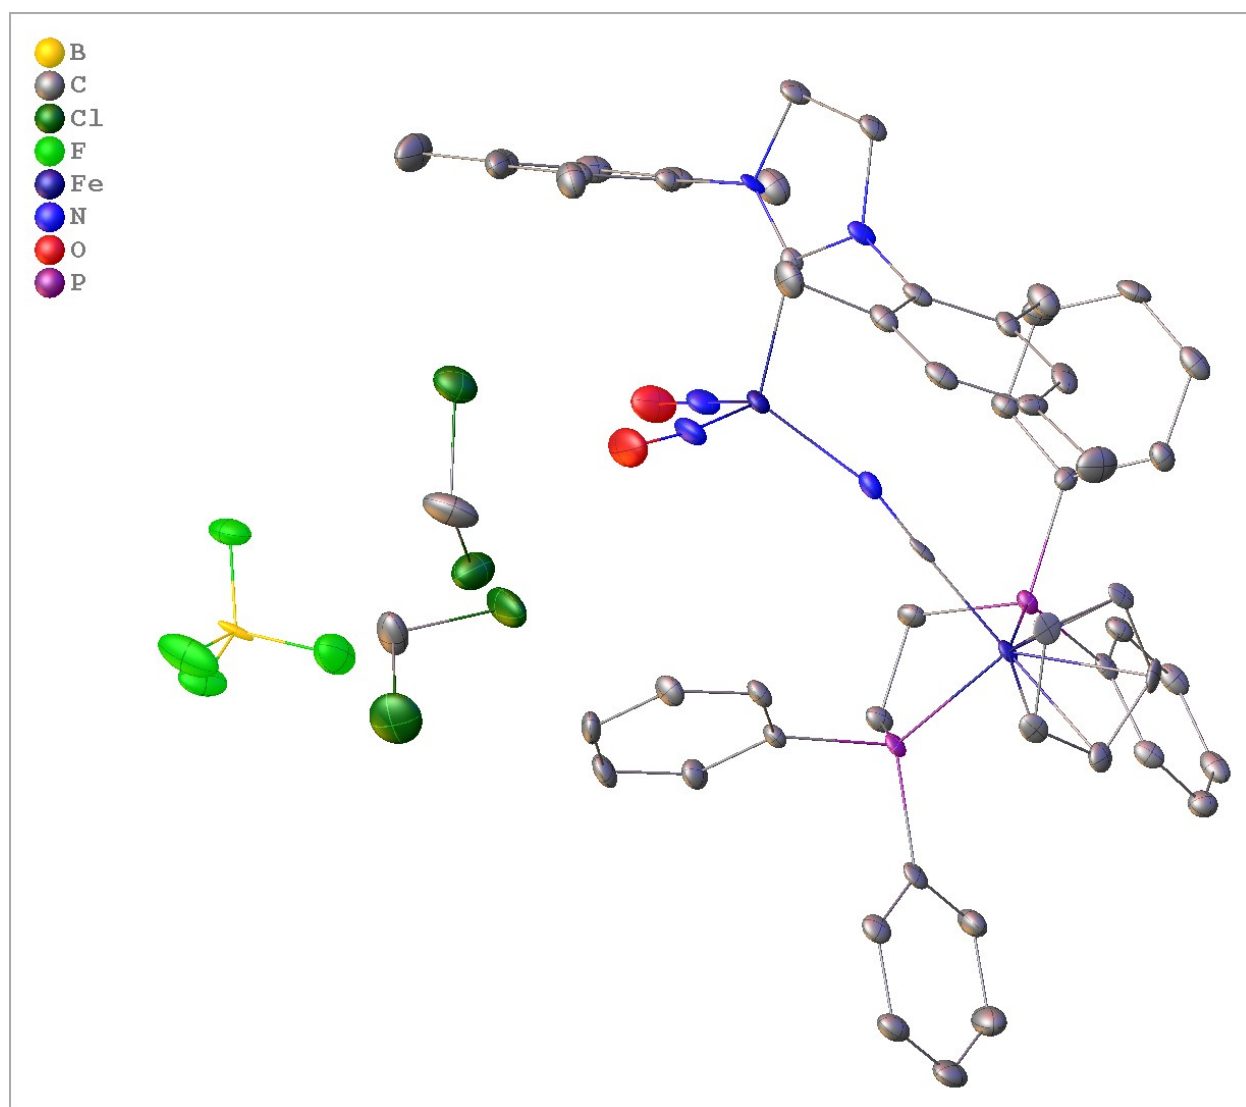

**Table T1.** Crystal data and structure refinement for **Fe-1**.

|                     |                                                                                                                              |
|---------------------|------------------------------------------------------------------------------------------------------------------------------|
| Identification code | DPPEFeCN_0m                                                                                                                  |
| Empirical formula   | C <sub>55</sub> H <sub>59</sub> BCl <sub>4</sub> F <sub>4</sub> Fe <sub>2</sub> N <sub>5</sub> O <sub>2</sub> P <sub>2</sub> |
| Formula weight      | 1224.32                                                                                                                      |
| Temperature/K       | 110.0                                                                                                                        |

|                                                |                                                                 |
|------------------------------------------------|-----------------------------------------------------------------|
| Crystal system                                 | triclinic                                                       |
| Space group                                    | P-1                                                             |
| a/Å                                            | 13.643(7)                                                       |
| b/Å                                            | 14.261(8)                                                       |
| c/Å                                            | 14.533(7)                                                       |
| $\alpha/^\circ$                                | 91.49(3)                                                        |
| $\beta/^\circ$                                 | 98.57(2)                                                        |
| $\gamma/^\circ$                                | 91.66(3)                                                        |
| Volume/Å <sup>3</sup>                          | 2794(3)                                                         |
| Z                                              | 2                                                               |
| $\rho_{\text{calc}}/\text{g}/\text{cm}^3$      | 1.456                                                           |
| $\mu/\text{mm}^{-1}$                           | 6.960                                                           |
| F(000)                                         | 1262.0                                                          |
| Crystal size/mm <sup>3</sup>                   | 0.1 × 0.1 × 0.1                                                 |
| Radiation                                      | CuK $\alpha$ ( $\lambda$ = 1.54184)                             |
| 2 $\Theta$ range for data collection/ $^\circ$ | 6.154 to 145.282                                                |
| Index ranges                                   | -16 ≤ h ≤ 16, -17 ≤ k ≤ 17, -17 ≤ l ≤ 17                        |
| Reflections collected                          | 73161                                                           |
| Independent reflections                        | 10802 [ $R_{\text{int}}$ = 0.0561, $R_{\text{sigma}}$ = 0.0330] |
| Data/restraints/parameters                     | 10802/0/682                                                     |
| Goodness-of-fit on F <sup>2</sup>              | 1.070                                                           |
| Final R indexes [ $I \geq 2\sigma(I)$ ]        | $R_1$ = 0.0756, $wR_2$ = 0.1766                                 |
| Final R indexes [all data]                     | $R_1$ = 0.0813, $wR_2$ = 0.1826                                 |
| Largest diff. peak/hole / e Å <sup>-3</sup>    | 1.48/-1.76                                                      |



**Figure S22.** Molecular structure of **Fe\*-1**.

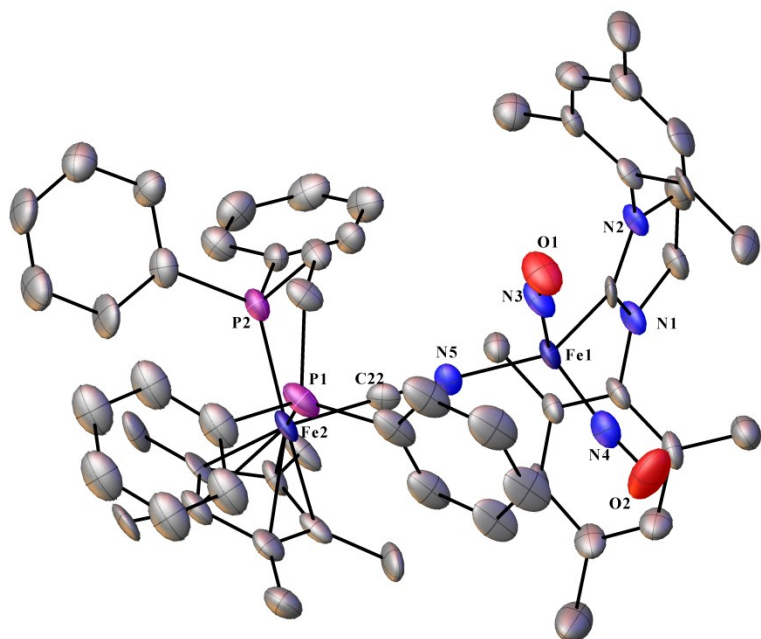

**Table T2. Crystal data and structure refinement for Fe\*-1.**

|                        |                           |                  |
|------------------------|---------------------------|------------------|
| Identification code    | fe5mecntnic_sq            |                  |
| Empirical formula      | C62 H73 B F4 Fe2 N5 O3 P2 |                  |
| Formula weight         | 1196.70                   |                  |
| Temperature            | 100.0 K                   |                  |
| Wavelength             | 1.54178 Å                 |                  |
| Crystal system         | Monoclinic                |                  |
| Space group            | P 1 21/c 1                |                  |
| Unit cell dimensions   | a = 21.1283(8) Å          | □ = 90°.         |
|                        | b = 15.3003(5) Å          | □ = 104.996(2)°. |
|                        | c = 23.5487(8) Å          | □ = 90°.         |
| Volume                 | 7353.3(4) Å <sup>3</sup>  |                  |
| Z                      | 4                         |                  |
| Density (calculated)   | 1.081 Mg/m <sup>3</sup>   |                  |
| Absorption coefficient | 3.981 mm <sup>-1</sup>    |                  |
| F(000)                 | 2508                      |                  |

|                                   |                                             |
|-----------------------------------|---------------------------------------------|
| Crystal size                      | 0.398 x 0.056 x 0.026 mm <sup>3</sup>       |
| Theta range for data collection   | 3.481 to 49.999°.                           |
| Index ranges                      | -20<=h<=20, -14<=k<=15, -23<=l<=23          |
| Reflections collected             | 126475                                      |
| Independent reflections           | 7546 [R(int) = 0.1564]                      |
| Completeness to theta = 49.999°   | 100.0 %                                     |
| Absorption correction             | Semi-empirical from equivalents             |
| Max. and min. transmission        | 0.7320 and 0.5006                           |
| Refinement method                 | Full-matrix least-squares on F <sup>2</sup> |
| Data / restraints / parameters    | 7546 / 572 / 785                            |
| Goodness-of-fit on F <sup>2</sup> | 1.138                                       |
| Final R indices [I>2sigma(I)]     | R1 = 0.0908, wR2 = 0.1833                   |
| R indices (all data)              | R1 = 0.1087, wR2 = 0.1917                   |
| Extinction coefficient            | n/a                                         |
| Largest diff. peak and hole       | 0.761 and -0.425 e.Å <sup>-3</sup>          |

**Figure S23.** Molecular structure of **Fe\*-CN**.

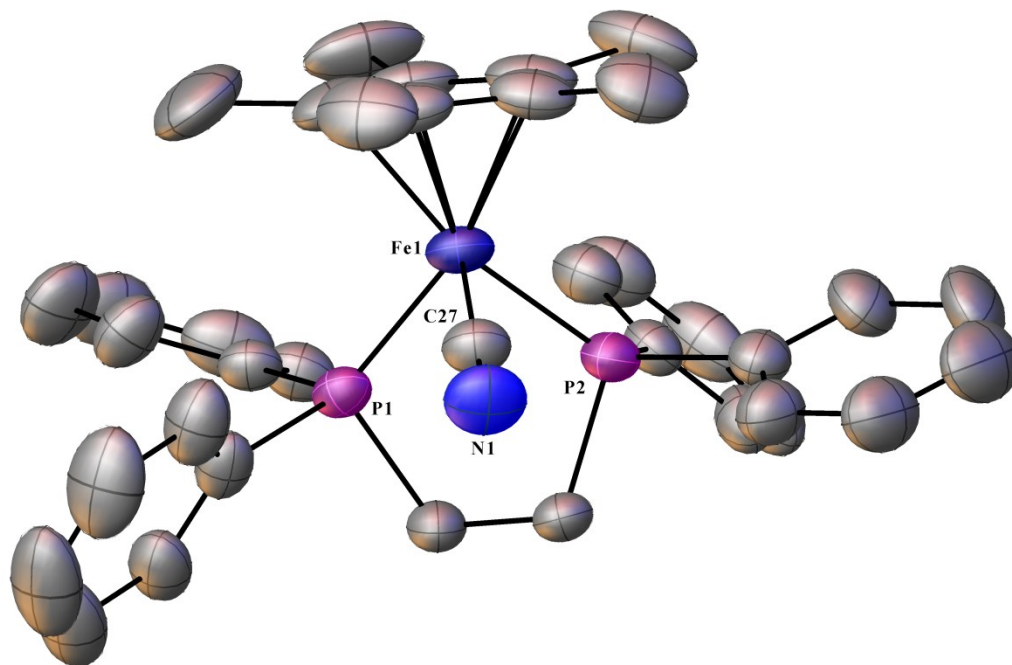

**Table T3.** Crystal data and structure refinement for **Fe\*-CN**.

|                      |                                                     |                  |
|----------------------|-----------------------------------------------------|------------------|
| Identification code  | cpmefecn                                            |                  |
| Empirical formula    | C <sub>37</sub> H <sub>39</sub> Fe N P <sub>2</sub> |                  |
| Formula weight       | 615.48                                              |                  |
| Temperature          | 293.0 K                                             |                  |
| Wavelength           | 0.71073 Å                                           |                  |
| Crystal system       | Monoclinic                                          |                  |
| Space group          | P 1 2 <sub>1</sub> /n 1                             |                  |
| Unit cell dimensions | a = 12.257(3) Å                                     | α = 90°.         |
|                      | b = 18.825(4) Å                                     | β = 106.316(2)°. |
|                      | c = 14.403(3) Å                                     | γ = 90°.         |
| Volume               | 3189.5(12) Å <sup>3</sup>                           |                  |
| Z                    | 4                                                   |                  |

|                                   |                                             |
|-----------------------------------|---------------------------------------------|
| Density (calculated)              | 1.282 Mg/m <sup>3</sup>                     |
| Absorption coefficient            | 0.599 mm <sup>-1</sup>                      |
| F(000)                            | 1296                                        |
| Crystal size                      | 0.5 x 0.392 x 0.262 mm <sup>3</sup>         |
| Theta range for data collection   | 1.828 to 24.480°.                           |
| Index ranges                      | -14<=h<=14, -21<=k<=21, -16<=l<=16          |
| Reflections collected             | 28726                                       |
| Independent reflections           | 5256 [R(int) = 0.0429]                      |
| Completeness to theta = 24.480°   | 99.4 %                                      |
| Absorption correction             | Semi-empirical from equivalents             |
| Max. and min. transmission        | 0.7450 and 0.6635                           |
| Refinement method                 | Full-matrix least-squares on F <sup>2</sup> |
| Data / restraints / parameters    | 5256 / 0 / 375                              |
| Goodness-of-fit on F <sup>2</sup> | 1.022                                       |
| Final R indices [I>2sigma(I)]     | R1 = 0.0416, wR2 = 0.0911                   |
| R indices (all data)              | R1 = 0.0643, wR2 = 0.1064                   |
| Extinction coefficient            | n/a                                         |
| Largest diff. peak and hole       | 0.341 and -0.226 e.Å <sup>-3</sup>          |

**Figure S24.** Molecular structure of **Fe\*-2**.

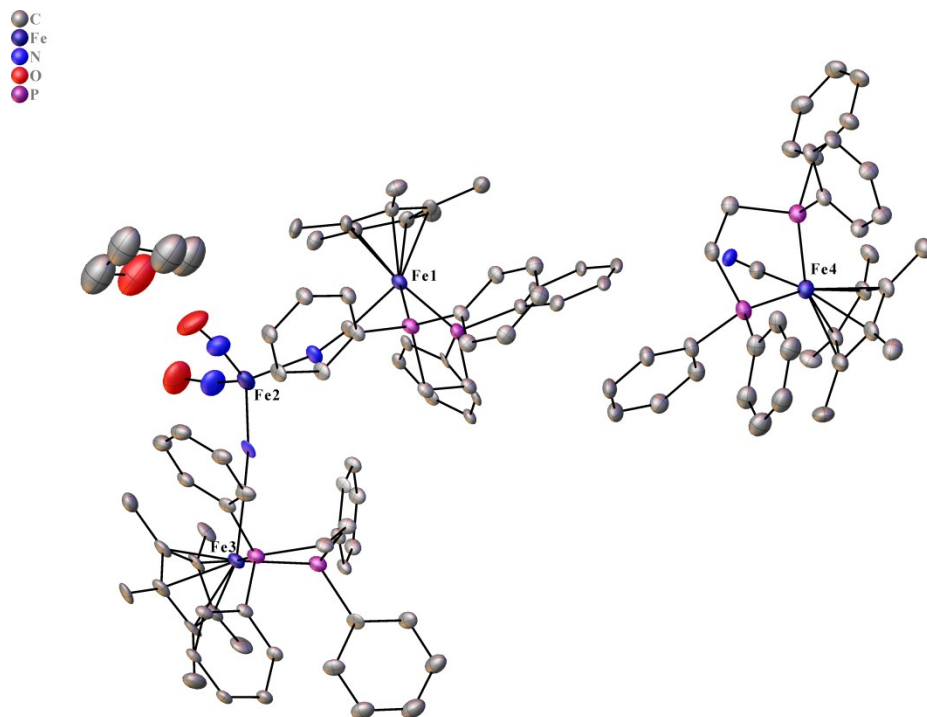

**Table T4.** Crystal data and structure refinement for **Fe\*-2**.

|                      |                                 |                             |
|----------------------|---------------------------------|-----------------------------|
| Identification code  | mqb                             |                             |
| Empirical formula    | C114.40 H123.80 Fe4 N5 O2.85 P6 |                             |
| Formula weight       | 2023.60                         |                             |
| Temperature          | 100.0 K                         |                             |
| Wavelength           | 1.54178 Å                       |                             |
| Crystal system       | Triclinic                       |                             |
| Space group          | P-1                             |                             |
| Unit cell dimensions | $a = 18.1733(14)$ Å             | $\alpha = 103.179(2)^\circ$ |
|                      | $b = 18.5346(14)$ Å             | $\beta = 113.672(2)^\circ$  |
|                      | $c = 20.2827(15)$ Å             | $\gamma = 106.712(2)^\circ$ |
| Volume               | $5514.3(7)$ Å <sup>3</sup>      |                             |
| Z                    | 2                               |                             |

|                                   |                                             |
|-----------------------------------|---------------------------------------------|
| Density (calculated)              | 1.219 Mg/m <sup>3</sup>                     |
| Absorption coefficient            | 5.345 mm <sup>-1</sup>                      |
| F(000)                            | 2124                                        |
| Crystal size                      | 0.178 x 0.043 x 0.01 mm <sup>3</sup>        |
| Theta range for data collection   | 2.58 to 40.10°.                             |
| Index ranges                      | -15<=h<=15, -15<=k<=15, -16<=l<=16          |
| Reflections collected             | 33016                                       |
| Independent reflections           | 6720 [R(int) = 0.1083]                      |
| Completeness to theta = 40.097°   | 99.5 %                                      |
| Absorption correction             | Semi-empirical from equivalents             |
| Max. and min. transmission        | 0.7479 and 0.6215                           |
| Refinement method                 | Full-matrix least-squares on F <sup>2</sup> |
| Data / restraints / parameters    | 6720 / 2133 / 1207                          |
| Goodness-of-fit on F <sup>2</sup> | 1.057                                       |
| Final R indices [I>2sigma(I)]     | R1 = 0.0702, wR2 = 0.1184                   |
| R indices (all data)              | R1 = 0.1074, wR2 = 0.1323                   |
| Extinction coefficient            | n/a                                         |
| Largest diff. peak and hole       | 0.567 and -0.497 e.Å <sup>-3</sup>          |

**Figure S25.** Molecular structure of  $(\text{Me}_3\text{P})_2\text{Fe}(\text{NO})_2$ .

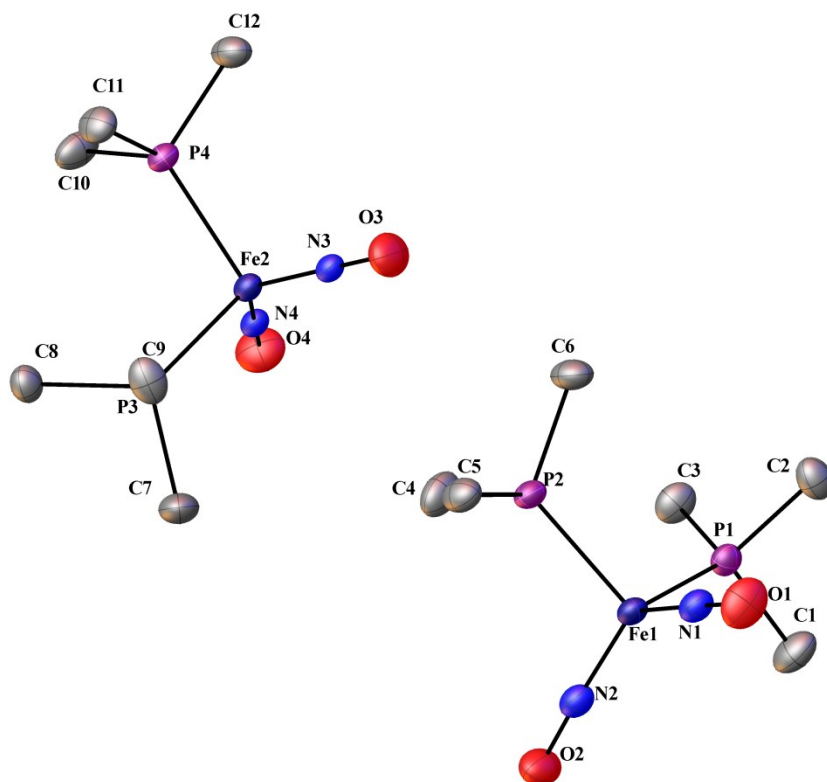

**Table T5.** Crystal data and structure refinement for  $(\text{Me}_3\text{P})_2\text{Fe}(\text{NO})_2$ .

|                      |                                                                                |                  |
|----------------------|--------------------------------------------------------------------------------|------------------|
| Identification code  | 4                                                                              |                  |
| Empirical formula    | C <sub>6</sub> H <sub>18</sub> Fe N <sub>2</sub> O <sub>2</sub> P <sub>2</sub> |                  |
| Formula weight       | 268.01                                                                         |                  |
| Temperature          | 150.15 K                                                                       |                  |
| Wavelength           | 0.71073 Å                                                                      |                  |
| Crystal system       | Triclinic                                                                      |                  |
| Space group          | P-1                                                                            |                  |
| Unit cell dimensions | a = 7.314(2) Å                                                                 | α = 119.081(3)°. |
|                      | b = 13.917(4) Å                                                                | β = 90.263(3)°.  |
|                      | c = 14.263(4) Å                                                                | γ = 93.646(4)°.  |
| Volume               | 1265.2(7) Å <sup>3</sup>                                                       |                  |

|                                   |                                             |
|-----------------------------------|---------------------------------------------|
| Z                                 | 4                                           |
| Density (calculated)              | 1.407 Mg/m <sup>3</sup>                     |
| Absorption coefficient            | 1.421 mm <sup>-1</sup>                      |
| F(000)                            | 560                                         |
| Crystal size                      | 0.3 x 0.27 x 0.2 mm <sup>3</sup>            |
| Theta range for data collection   | 1.635 to 24.993°.                           |
| Index ranges                      | -8<=h<=8, -16<=k<=14, 0<=l<=16              |
| Reflections collected             | 4408                                        |
| Independent reflections           | 4408 [R(int) = 0.0441]                      |
| Completeness to theta = 24.993°   | 99.0 %                                      |
| Absorption correction             | Semi-empirical from equivalents             |
| Max. and min. transmission        | 0.746 and 0.509                             |
| Refinement method                 | Full-matrix least-squares on F <sup>2</sup> |
| Data / restraints / parameters    | 4408 / 0 / 229                              |
| Goodness-of-fit on F <sup>2</sup> | 0.999                                       |
| Final R indices [I>2sigma(I)]     | R1 = 0.0379, wR2 = 0.1002                   |
| R indices (all data)              | R1 = 0.0513, wR2 = 0.1058                   |
| Extinction coefficient            | n/a                                         |
| Largest diff. peak and hole       | 0.592 and -1.032 e.Å <sup>-3</sup>          |
